# Supplementary material for: The effect of molecular dynamics sampling on the calculated observable gas-phase structures
Source: Royal Society of Chemistry journal article supplement (doi:10.1039/c6cp02973f), 2016-01-01
Supplement: c6cp02973f1.pdf [file c6cp02973f1.pdf]

## Electronic Supporting Information for the article: The Effect of Molecular Dynamics Sampling on the Calculated Observable Gas-Phase Structures

Unique terms for Benzene at 300K obtained using different methods at BLYP/TZVP level of theory. For the abbreviations used see the article's text.

Table S1. ElDiff

| At1 | At2 | re     | l      | re-ra   | kappa | #of eqv. terms |
|-----|-----|--------|--------|---------|-------|----------------|
| C1  | H12 | 1.0899 | 0.0752 | -0.0161 | 11.2  | 6              |
| C3  | C7  | 1.4020 | 0.0460 | -0.0068 | 1.4   | 6              |
| C3  | H9  | 2.1637 | 0.0980 | -0.0133 | 2.9   | 12             |
| C6  | C7  | 2.4284 | 0.0550 | -0.0094 | 0.6   | 6              |
| H4  | H8  | 2.4919 | 0.1588 | -0.0123 | -15.8 | 6              |
| C2  | C7  | 2.8040 | 0.0613 | -0.0101 | 0.1   | 3              |
| C2  | H11 | 3.4160 | 0.0940 | -0.0161 | 6.3   | 12             |
| C3  | H8  | 3.8940 | 0.0933 | -0.0169 | 9.0   | 6              |
| H5  | H11 | 4.3162 | 0.1287 | -0.0202 | 2.0   | 6              |
| H11 | H12 | 4.9839 | 0.1170 | -0.0222 | 17.8  | 3              |

Table S2. PIMD

| At1 | At2 | re     | l      | re-ra   | kappa | #of eqv. terms |
|-----|-----|--------|--------|---------|-------|----------------|
| C1  | H12 | 1.0899 | 0.0770 | -0.0131 | 12.8  | 6              |
| C3  | C7  | 1.4020 | 0.0464 | -0.0040 | 1.5   | 6              |
| C3  | H9  | 2.1637 | 0.0993 | -0.0084 | 4.4   | 12             |
| C6  | C7  | 2.4284 | 0.0553 | -0.0047 | 0.4   | 6              |
| H4  | H8  | 2.4919 | 0.1604 | -0.0064 | -10.1 | 6              |
| C2  | C7  | 2.8040 | 0.0605 | -0.0047 | -1.2  | 3              |
| C2  | H11 | 3.4160 | 0.0953 | -0.0086 | 7.0   | 12             |
| C3  | H8  | 3.8940 | 0.0939 | -0.0084 | 8.4   | 6              |
| H5  | H11 | 4.3162 | 0.1301 | -0.0103 | 3.7   | 6              |
| H11 | H12 | 4.9839 | 0.1188 | -0.0105 | 16.2  | 3              |

Table S3. NH

| At1 | At2 | re     | l      | re-ra   | kappa | #of eqv. terms |
|-----|-----|--------|--------|---------|-------|----------------|
| C1  | H12 | 1.0899 | 0.0217 | 0.0004  | 0.2   | 6              |
| C3  | C7  | 1.4020 | 0.0242 | -0.0003 | 0.4   | 6              |
| C3  | H9  | 2.1637 | 0.0473 | 0.0027  | -0.6  | 12             |
| C6  | C7  | 2.4284 | 0.0430 | 0.0013  | 0.1   | 6              |
| H4  | H8  | 2.4919 | 0.0883 | 0.0048  | -4.8  | 6              |
| C2  | C7  | 2.8040 | 0.0585 | 0.0023  | -1.0  | 3              |
| C2  | H11 | 3.4160 | 0.0488 | 0.0052  | 0.3   | 12             |
| C3  | H8  | 3.8940 | 0.0620 | 0.0067  | -0.6  | 6              |
| H5  | H11 | 4.3162 | 0.0609 | 0.0093  | -1.2  | 6              |
| H11 | H12 | 4.9839 | 0.0658 | 0.0117  | -0.2  | 3              |

Table S4. NH+QA

| At1 | At2 | re     | l      | re-ra   | kappa | #of eqv. terms |
|-----|-----|--------|--------|---------|-------|----------------|
| C1  | H12 | 1.0899 | 0.0759 | -0.0065 | 8.4   | 6              |
| C3  | C7  | 1.4020 | 0.0467 | -0.0054 | 2.1   | 6              |
| C3  | H9  | 2.1637 | 0.1083 | 0.0105  | -5.5  | 12             |
| C6  | C7  | 2.4284 | 0.0599 | 0.0019  | 0.1   | 6              |
| H4  | H8  | 2.4919 | 0.1690 | 0.0181  | -22.2 | 6              |
| C2  | C7  | 2.8040 | 0.0663 | 0.0029  | -0.7  | 3              |
| C2  | H11 | 3.4160 | 0.1117 | 0.0065  | 2.9   | 12             |
| C3  | H8  | 3.8940 | 0.1245 | 0.0109  | -2.9  | 6              |
| H5  | H11 | 4.3162 | 0.1422 | 0.0167  | -9.8  | 6              |
| H11 | H12 | 4.9839 | 0.1503 | 0.0147  | 2.2   | 3              |

Table S5. GLE

| At1 | At2 | re     | l      | re-ra   | kappa | #of eqv. terms |
|-----|-----|--------|--------|---------|-------|----------------|
| C1  | H12 | 1.0899 | 0.0300 | -0.0019 | 0.8   | 6              |
| C3  | C7  | 1.4020 | 0.0283 | -0.0074 | 0.8   | 6              |
| C3  | H9  | 2.1637 | 0.0544 | -0.0048 | 0.2   | 12             |
| C6  | C7  | 2.4284 | 0.0404 | -0.0103 | 0.4   | 6              |
| H4  | H8  | 2.4919 | 0.0990 | -0.0035 | -2.0  | 6              |
| C2  | C7  | 2.8040 | 0.0496 | -0.0109 | -0.0  | 3              |
| C2  | H11 | 3.4160 | 0.0531 | -0.0067 | 0.8   | 12             |
| C3  | H8  | 3.8940 | 0.0571 | -0.0065 | 0.6   | 6              |
| H5  | H11 | 4.3162 | 0.0700 | -0.0028 | -0.1  | 6              |
| H11 | H12 | 4.9839 | 0.0640 | -0.0010 | 0.3   | 3              |

Table S6. GLE+QA

| At1 | At2 | re     | l      | re-ra   | kappa | #of eqv. terms |
|-----|-----|--------|--------|---------|-------|----------------|
| C1  | H12 | 1.0899 | 0.0754 | -0.0121 | 11.4  | 6              |
| C3  | C7  | 1.4020 | 0.0471 | -0.0102 | 1.7   | 6              |
| C3  | H9  | 2.1637 | 0.1044 | -0.0014 | 0.5   | 12             |
| C6  | C7  | 2.4284 | 0.0575 | -0.0095 | -0.1  | 6              |
| H4  | H8  | 2.4919 | 0.1641 | 0.0045  | -5.5  | 6              |
| C2  | C7  | 2.8040 | 0.0641 | -0.0099 | -0.6  | 3              |
| C2  | H11 | 3.4160 | 0.1030 | -0.0063 | 3.1   | 12             |
| C3  | H8  | 3.8940 | 0.1067 | -0.0054 | 1.7   | 6              |
| H5  | H11 | 4.3162 | 0.1382 | 0.0006  | -0.4  | 6              |
| H11 | H12 | 4.9839 | 0.1314 | 0.0010  | 1.6   | 3              |

Table S7. Q-GLE

| At1 | At2 | re     | l      | re-ra   | kappa | #of eqv. terms |
|-----|-----|--------|--------|---------|-------|----------------|
| C1  | H12 | 1.0899 | 0.0682 | -0.0108 | 18.9  | 6              |
| C3  | C7  | 1.4020 | 0.0500 | -0.0046 | 5.3   | 6              |
| C3  | H9  | 2.1637 | 0.0991 | -0.0054 | 14.1  | 12             |
| C6  | C7  | 2.4284 | 0.0556 | -0.0061 | 1.9   | 6              |
| H4  | H8  | 2.4919 | 0.1677 | -0.0018 | -2.8  | 6              |
| C2  | C7  | 2.8040 | 0.0629 | -0.0061 | 1.8   | 3              |
| C2  | H11 | 3.4160 | 0.0909 | -0.0061 | 15.2  | 12             |
| C3  | H8  | 3.8940 | 0.0892 | -0.0060 | 17.5  | 6              |
| H5  | H11 | 4.3162 | 0.1260 | -0.0044 | 16.1  | 6              |
| H11 | H12 | 4.9839 | 0.1098 | -0.0036 | 36.9  | 3              |
